# Supplementary material for: Inhibition of HDAC6 activity through interaction with RanBPM and its associated CTLH complex
Source: Springer Nature journal article supplement (doi:10.1186/s12885-017-3430-2), 2017-07-01
Supplement: MOESM1 [file 12497908]

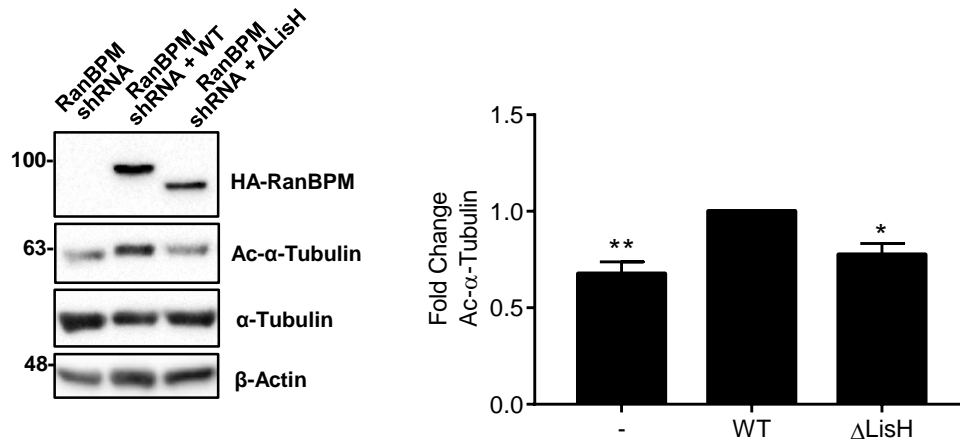

**Figure S1. Deletion of RanBPM LisH domain prevents inhibition of HDAC6 acetylase activity.** Whole cell extracts from RanBPM shRNA HeLa cells either left untransfected or transfected with HA-RanBPM-WT or HA-RanBPM-ΔLisH were analyzed by western blot with the antibodies indicated. Right, quantification of relative amounts of acetylated α-tubulin was normalized to total α-tubulin levels. Relative amounts of acetylated α-tubulin in untransfected and HA-RanBPM-ΔLisH-transfected cells were normalized to WT. Results are averaged from three different experiments, with error bars indicating SEM. P<0.05 (\*); P<0.005 (\*\*).
