# Supplementary material for: Inhibition of HDAC6 activity through interaction with RanBPM and its associated CTLH complex
Source: Springer Nature journal article supplement (doi:10.1186/s12885-017-3430-2), 2017-07-01
Supplement: MOESM2 [file 12497908]

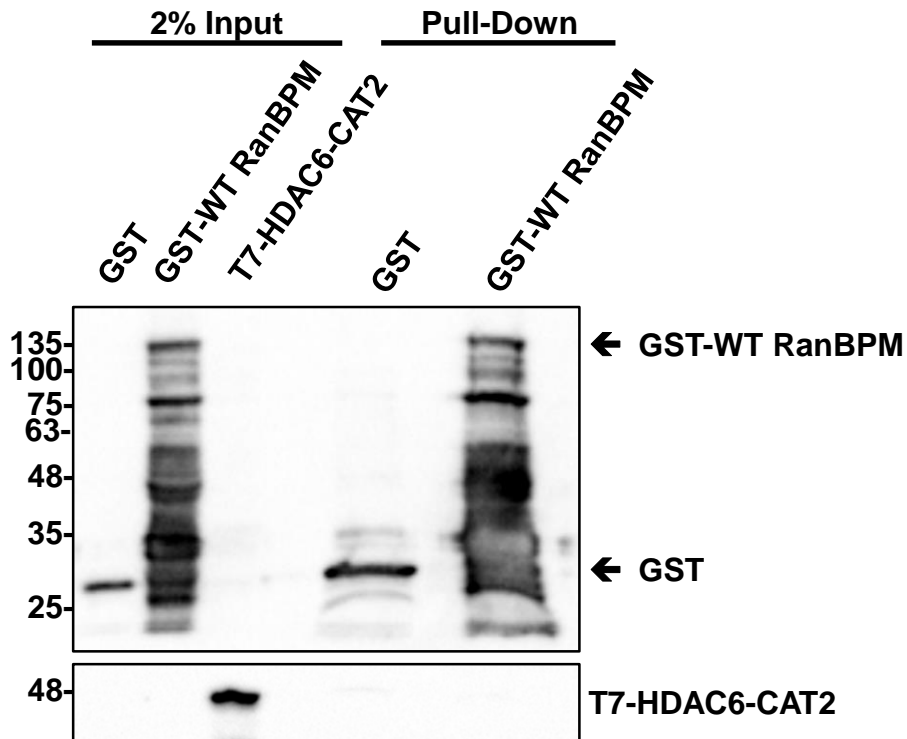

**Figure S2. RanBPM does not directly interact with HDAC6 CAT 2.** GST pull-down assays were performed using GST and GST-WT-RanBPM proteins purified on glutathione-agarose beads incubated with extracts from E coli-expressing HDAC6 CAT2. Pull-downs were analyzed by Western blot with antibodies to GST (top panel) and T7 (bottom panel).
