# Supplementary material for: Inhibition of HDAC6 activity through interaction with RanBPM and its associated CTLH complex
Source: Springer Nature journal article supplement (doi:10.1186/s12885-017-3430-2), 2017-07-01
Supplement: MOESM3 [file 12497908]

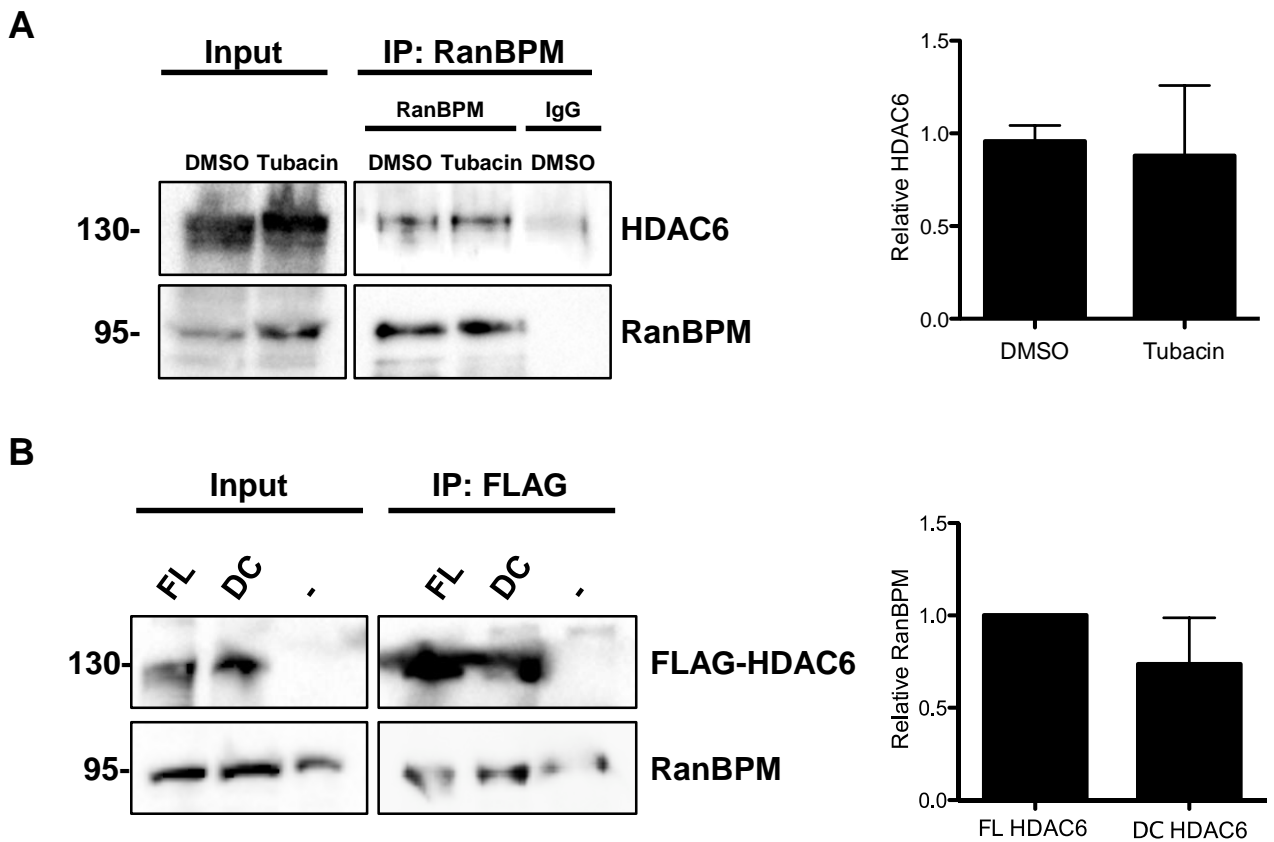

**Figure S3. RanBPM associates with catalytically inactive or Tubacin-inhibited HDAC6.** **a** *Left*, whole cell extracts were prepared from HEK cells treated with either DMSO or 10 $\mu$ M Tubacin for 16 hours. Extracts were then immunoprecipitated with either RanBPM or IgG. Immunoprecipitates were analyzed by western blot with an HDAC6 antibody. RanBPM immunoprecipitation was verified using a RanBPM antibody. Input, 5% input extract. *Right*, quantification of relative amounts of co-immunoprecipitated HDAC6 normalized to immunoprecipitated RanBPM. Results are averaged from three different experiments with error bars indicating SEM.  $P < 0.05$  (\*). **b** *Left*, whole cell extracts were prepared from HDAC6 knockout MEFs untransfected (-) or transfected with full length (FL) or mutated catalytically inactive (DC) HDAC6 constructs. HDAC6 was immunoprecipitated with a FLAG antibody and immunoprecipitates were analyzed by western blot with a RanBPM antibody. HDAC6 mutant immunoprecipitation was verified using an HDAC6 antibody. Input, 5% input extract. *Right*, quantification of relative amounts of co-immunoprecipitated RanBPM normalized to immunoprecipitated HDAC6. Results are averaged from three different experiments with error bars indicating SEM.  $P < 0.05$  (\*).
